# Supplementary material for: Sub-daily dynamics of urban tree xylem water and ambient vapor
Source: Copernicus journal article supplement (doi:10.5194/egusphere-2025-1444), 2025-04-04
Supplement: Supplementary file 1 [file egusphere-2025-1444-supplement.pdf]

## Supplementary Material

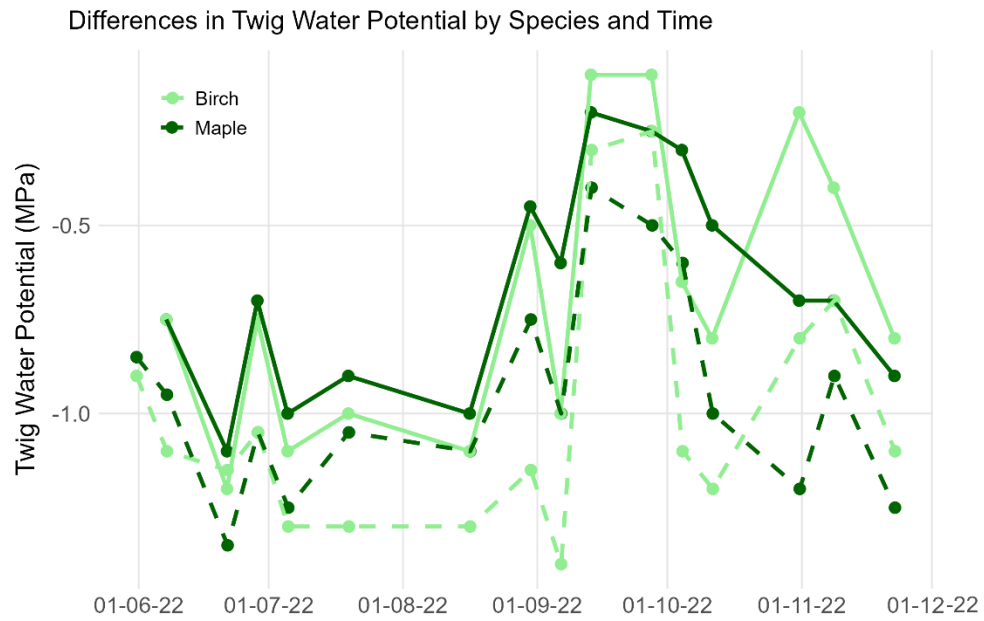

**Figure S1: Timeseries of morning (~9:00 am, solid lines) and midday (~12:30 pm, dashed lines) twig water potential of Maple (dark green) and Birch (light green) measured weekly from 31.05.-22.11.2022.**

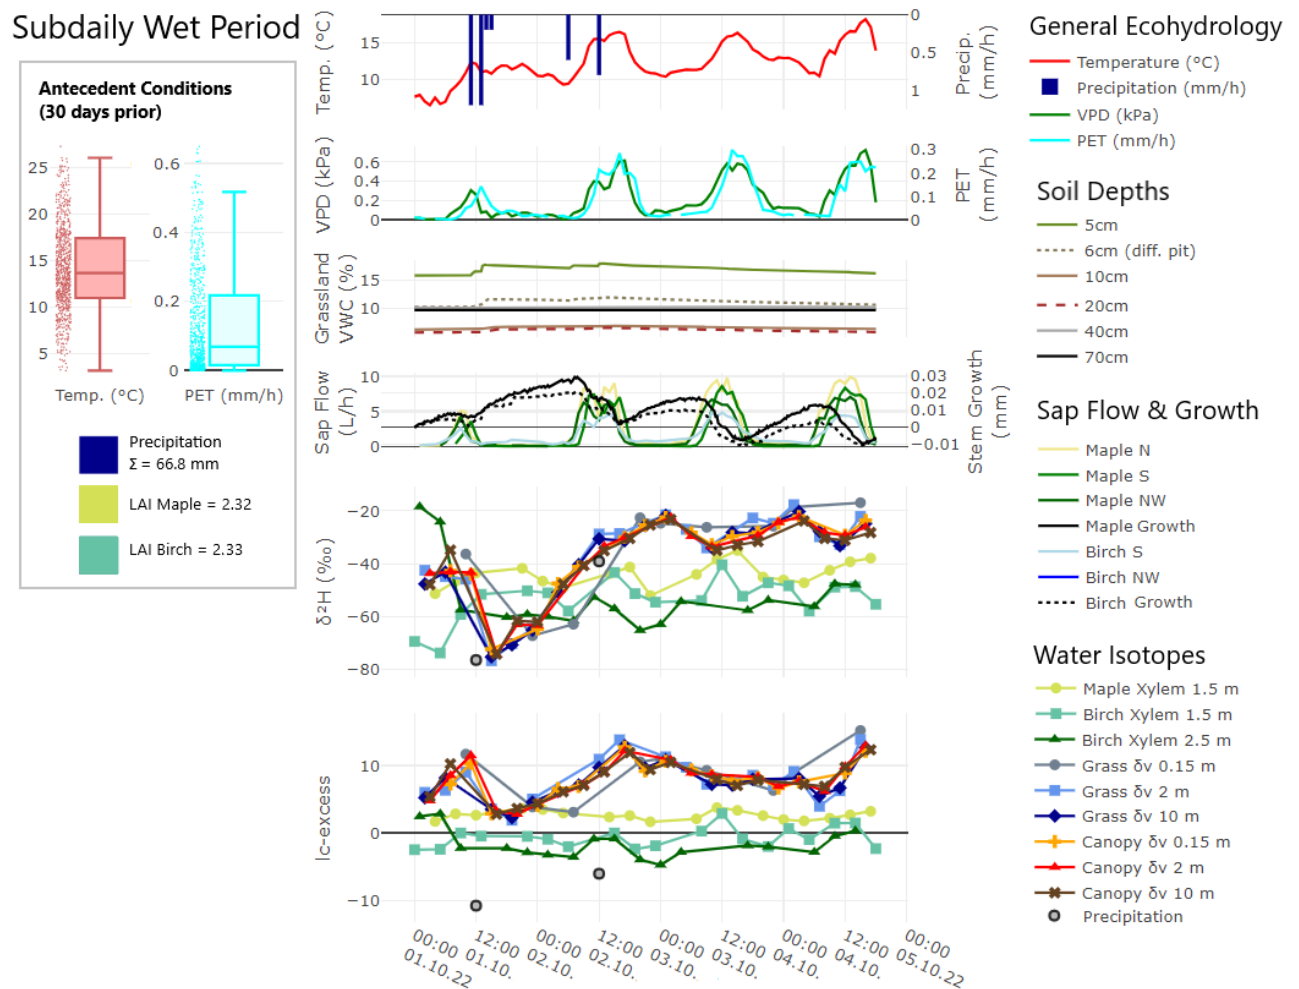

10 **Figure S2: Wet conditions, after completed rewetting: Exemplary sub-daily timeseries displaying diurnal variation of tree xylem water ( $\delta_{xy}$ ), atmospheric vapour ( $\delta_v$ ), precipitation water isotopes and measured ecohydrological variables. The top-left box shows antecedent conditions 30 days prior the timeseries: hourly data of temperature and PET, precipitation as 30-day sum and mean LAI of each tree.**

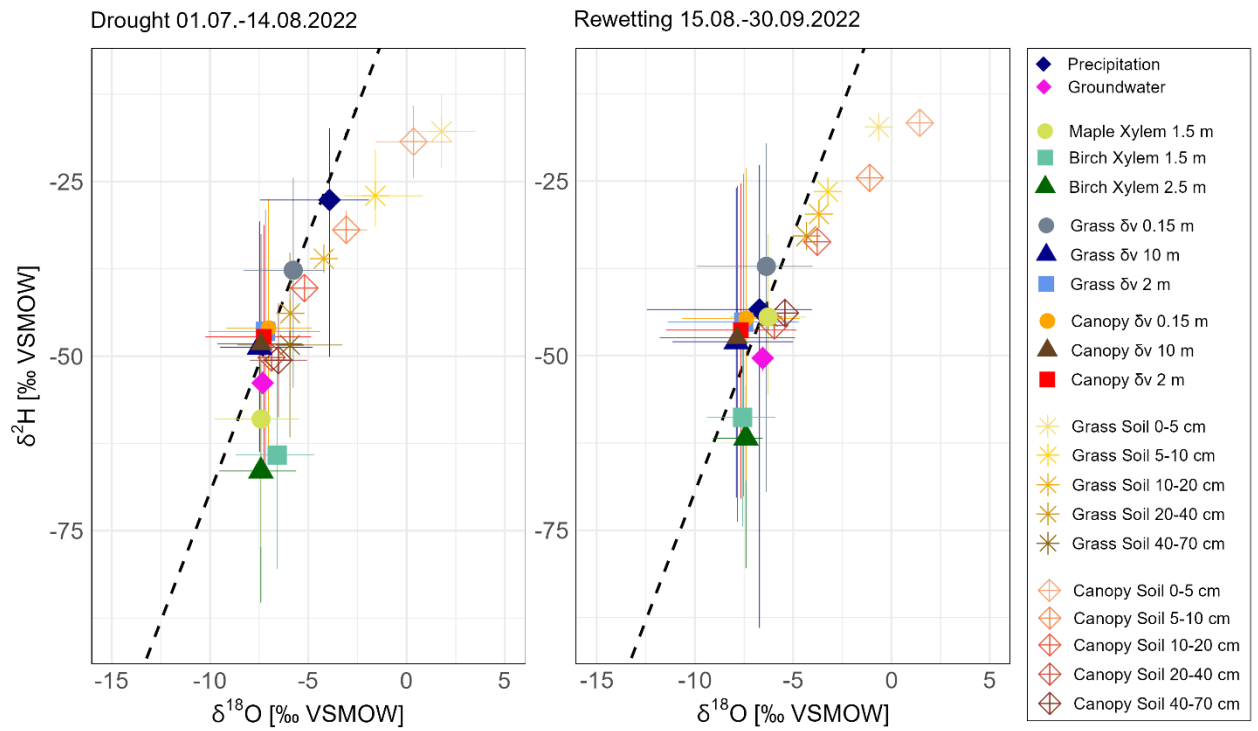

15 **Figure S3: Dual isotope plot of all measured waters (mean with outliers) during drought 01.07.-14.08.2022 and rewetting period 15.08.-30.09.2022. LMWL derived from 2022 precipitation isotopes measured at the study site in Berlin-Friedrichshagen as dashed line.**
